# Supplementary material
Source: PubMed Central journal article supplement (PMC4865380)
Supplement: NIHMS782006-supplement-supplement_1.pdf [file NIHMS782006-supplement-supplement_1.pdf]

**Online Resource 1**

**Table S1** Results of multinomial logit models predicting international and domestic (interstate) migration for work and other reasons for Mexican men and women, 2005–2010

|                                          | Men                   |                        |                       |                        | Women                 |                        |                       |                        |
|------------------------------------------|-----------------------|------------------------|-----------------------|------------------------|-----------------------|------------------------|-----------------------|------------------------|
|                                          | Int. Mig.<br>for Work | Int. Mig.<br>for Other | Dom. Mig.<br>for Work | Dom. Mig.<br>for Other | Int. Mig.<br>for Work | Int. Mig.<br>for Other | Dom. Mig.<br>for Work | Dom. Mig.<br>for Other |
| Age (baseline 15 to 24 years)            |                       |                        |                       |                        |                       |                        |                       |                        |
| 25 to 34 years                           | 0.353**<br>(0.113)    | 0.415<br>(0.215)       | 0.187*<br>(0.088)     | -0.342**<br>(0.107)    | -0.138<br>(0.194)     | 0.181<br>(0.194)       | 0.199<br>(0.145)      | -0.463**<br>(0.102)    |
| 35 to 44 years                           | -0.158<br>(0.126)     | 0.371<br>(0.326)       | -0.372**<br>(0.110)   | -0.874**<br>(0.145)    | -0.650**<br>(0.249)   | -0.870**<br>(0.288)    | -0.561*<br>(0.224)    | -1.360**<br>(0.139)    |
| 45 to 55 years                           | -0.670**<br>(0.146)   | 0.271<br>(0.348)       | -0.520**<br>(0.123)   | -0.995**<br>(0.177)    | -0.886**<br>(0.331)   | -0.732*<br>(0.292)     | -0.735**<br>(0.247)   | -1.408**<br>(0.159)    |
| Education (baseline less than primary)   |                       |                        |                       |                        |                       |                        |                       |                        |
| Complete primary                         | 0.158<br>(0.122)      | 0.007<br>(0.390)       | 0.059<br>(0.133)      | 0.179<br>(0.170)       | 0.805*<br>(0.337)     | -0.229<br>(0.335)      | 0.319<br>(0.266)      | 0.145<br>(0.150)       |
| Complete middle school                   | 0.059<br>(0.126)      | 0.192<br>(0.356)       | -0.038<br>(0.130)     | 0.179<br>(0.167)       | 0.724*<br>(0.315)     | -0.186<br>(0.337)      | 0.211<br>(0.253)      | -0.028<br>(0.148)      |
| Complete high school or technical degree | -0.225<br>(0.141)     | 0.607<br>(0.348)       | 0.100<br>(0.137)      | 0.294<br>(0.166)       | 1.091**<br>(0.327)    | 0.256<br>(0.341)       | 0.523*<br>(0.256)     | 0.093<br>(0.150)       |
| Complete college or more                 | -0.306<br>(0.176)     | 0.580<br>(0.357)       | 0.585**<br>(0.140)    | 0.227<br>(0.185)       | 1.193**<br>(0.332)    | 0.975**<br>(0.334)     | 1.474**<br>(0.252)    | 0.127<br>(0.167)       |
| Marital Status (baseline single)         |                       |                        |                       |                        |                       |                        |                       |                        |
| Married                                  | 0.009<br>(0.106)      | -1.284**<br>(0.278)    | -0.628**<br>(0.095)   | -0.876**<br>(0.137)    | -0.455*<br>(0.225)    | -0.665**<br>(0.218)    | -1.498**<br>(0.199)   | -0.860**<br>(0.115)    |
| Cohabiting                               | 0.141<br>(0.141)      | -1.171**<br>(0.309)    | -0.333**<br>(0.119)   | -0.418**<br>(0.150)    | 0.146<br>(0.371)      | -1.134**<br>(0.270)    | -0.812**<br>(0.212)   | -0.262*<br>(0.127)     |
| Separated, divorced or widowed           | -0.090<br>(0.231)     | -0.965*<br>(0.474)     | 0.074<br>(0.153)      | 0.488*<br>(0.205)      | 0.627*<br>(0.281)     | -0.231<br>(0.286)      | -0.532*<br>(0.244)    | -0.155<br>(0.157)      |
| Born out of state                        | 0.258**<br>(0.098)    | 0.316<br>(0.215)       | 0.711**<br>(0.071)    | 1.261**<br>(0.090)     | 0.227<br>(0.228)      | 0.694**<br>(0.171)     | 0.790**<br>(0.132)    | 1.222**<br>(0.075)     |
| Employment (baseline not econ. active)   |                       |                        |                       |                        |                       |                        |                       |                        |
| Employed informal sector                 | 0.501**<br>(0.119)    | -0.488*<br>(0.241)     | 0.691**<br>(0.105)    | -0.043<br>(0.104)      | 0.221<br>(0.202)      | -0.603**<br>(0.187)    | 0.474**<br>(0.149)    | 0.185*<br>(0.081)      |
| Employed formal sector                   | -0.092<br>(0.137)     | -1.050**<br>(0.239)    | 0.481**<br>(0.117)    | -0.149<br>(0.112)      | -0.024<br>(0.203)     | -0.821**<br>(0.198)    | 0.117<br>(0.146)      | -0.119<br>(0.098)      |
| Unemployed                               | 1.059**<br>(0.156)    | -0.193<br>(0.358)      | 1.237**<br>(0.134)    | 0.117<br>(0.163)       | 0.012<br>(0.301)      | 0.141<br>(0.285)       | 0.831**<br>(0.184)    | 0.288<br>(0.155)       |
| Household Variables                      |                       |                        |                       |                        |                       |                        |                       |                        |
| Number of household members              | 0.135**<br>(0.025)    | 0.165**<br>(0.055)     | 0.132**<br>(0.021)    | 0.078**<br>(0.025)     | 0.266**<br>(0.049)    | 0.113**<br>(0.042)     | 0.131**<br>(0.034)    | 0.095**<br>(0.024)     |
| Number of children in household          | -0.112**              | -0.180                 | -0.166**              | -0.106*                | -0.296**              | -0.252**               | -0.117                | -0.095                 |

|                                          |          |          |          |          |          |          |          |          |
|------------------------------------------|----------|----------|----------|----------|----------|----------|----------|----------|
|                                          | (0.040)  | (0.108)  | (0.038)  | (0.052)  | (0.085)  | (0.090)  | (0.088)  | (0.051)  |
| Number of informal workers               | 0.041    | -0.076   | -0.008   | 0.051    | 0.066    | -0.042   | 0.022    | -0.050   |
|                                          | (0.041)  | (0.096)  | (0.035)  | (0.042)  | (0.094)  | (0.073)  | (0.051)  | (0.038)  |
| Informal family business                 | -0.174   | 0.451    | -0.171   | 0.218    | -0.268   | 0.573*   | 0.013    | 0.172    |
|                                          | (0.143)  | (0.260)  | (0.115)  | (0.123)  | (0.290)  | (0.225)  | (0.190)  | (0.106)  |
| Household income                         | -0.017*  | -0.001   | -0.009*  | 0.010**  | -0.030*  | 0.007**  | -0.001   | 0.007**  |
|                                          | (0.007)  | (0.006)  | (0.004)  | (0.003)  | (0.013)  | (0.002)  | (0.005)  | (0.002)  |
| Contextual Variables                     |          |          |          |          |          |          |          |          |
| Mean wages                               | -0.067** | -0.026   | 0.002    | 0.040**  | -0.039*  | -0.012   | 0.003    | 0.015    |
|                                          | (0.011)  | (0.027)  | (0.010)  | (0.012)  | (0.020)  | (0.017)  | (0.016)  | (0.010)  |
| Unemployment rate                        | -0.036   | -0.032   | -0.098** | 0.007    | -0.187** | 0.046    | 0.088    | 0.010    |
|                                          | (0.031)  | (0.070)  | (0.028)  | (0.038)  | (0.067)  | (0.072)  | (0.094)  | (0.029)  |
| Percentage informal workers              | 0.006    | 0.014    | -0.023** | -0.031** | -0.013   | -0.022   | -0.034** | -0.013*  |
|                                          | (0.007)  | (0.014)  | (0.006)  | (0.008)  | (0.013)  | (0.013)  | (0.011)  | (0.006)  |
| International migrant networks           | 0.036**  | 0.051**  | -0.031** | 0.023*   | 0.032*   | 0.067**  | 0.014    | 0.021*   |
|                                          | (0.007)  | (0.015)  | (0.009)  | (0.010)  | (0.014)  | (0.014)  | (0.015)  | (0.009)  |
| Urbanization (baseline 15,000 to 99,999) |          |          |          |          |          |          |          |          |
| Population greater than 100,000          | -0.318** | 0.105    | -0.426** | -0.151   | -0.247   | 0.655**  | -0.216   | 0.120    |
|                                          | (0.110)  | (0.275)  | (0.106)  | (0.135)  | (0.218)  | (0.245)  | (0.202)  | (0.109)  |
| Oversampled city                         | -0.360** | -0.218   | -0.171   | -0.001   | -0.157   | 0.456*   | -0.123   | 0.098    |
|                                          | (0.111)  | (0.281)  | (0.101)  | (0.119)  | (0.220)  | (0.219)  | (0.165)  | (0.098)  |
| Region (baseline South)                  |          |          |          |          |          |          |          |          |
| Northwest                                | 0.543**  | 0.757*   | 0.043    | -0.064   | 1.178**  | 1.032**  | -0.186   | -0.187   |
|                                          | (0.156)  | (0.347)  | (0.128)  | (0.145)  | (0.344)  | (0.287)  | (0.203)  | (0.117)  |
| Northeast                                | 0.803**  | 1.068**  | -0.019   | -0.139   | 1.538**  | 1.535**  | -0.458*  | -0.080   |
|                                          | (0.165)  | (0.408)  | (0.142)  | (0.177)  | (0.353)  | (0.318)  | (0.230)  | (0.129)  |
| Center                                   | 0.571**  | 0.443    | -0.324** | -0.108   | 0.663*   | 0.019    | -0.954** | -0.142   |
|                                          | (0.120)  | (0.305)  | (0.104)  | (0.133)  | (0.261)  | (0.244)  | (0.228)  | (0.101)  |
| Center-west                              | 0.967**  | 0.914**  | -0.046   | -0.411** | 0.933**  | 0.818**  | -0.609** | -0.501** |
|                                          | (0.124)  | (0.303)  | (0.110)  | (0.138)  | (0.301)  | (0.237)  | (0.169)  | (0.107)  |
| Recession                                | -0.518** | -0.230   | -0.010   | -0.165   | -0.186   | -0.399*  | -0.099   | -0.147   |
|                                          | (0.100)  | (0.259)  | (0.074)  | (0.104)  | (0.208)  | (0.169)  | (0.137)  | (0.084)  |
| Constant                                 | -3.869** | -7.066** | -3.605** | -4.841** | -6.057** | -6.303** | -4.975** | -4.597** |
|                                          | (0.304)  | (0.694)  | (0.238)  | (0.316)  | (0.609)  | (0.606)  | (0.426)  | (0.252)  |
| Pseudo- $R^2$                            | .0649    |          |          |          | .0844    |          |          |          |
| $n$                                      | 298931   |          |          |          | 336055   |          |          |          |

Notes: These models are similar to those presented in Table 2 in the main article, except that they include domestic migration for work and for other reasons as alternatives to international migration. Standard errors are adjusted for within-household clustering using a Huber/White estimator.

\* $p < .05$ ; \*\* $p < .01$  (two-tailed tests)
